# Supplementary material for: Exploring the adsorption of short and long chain per- and polyfluoroalkyl substances (PFAS) to different zeolites using environmental samples
Source: Royal Society of Chemistry journal article supplement (doi:10.1039/d3ew00225j), 2023-01-01
Supplement: d3ew00225j1.pdf [file d3ew00225j1.pdf]

1 **Exploring the adsorption of short and long chain per- and polyfluoroalkyl substances (PFAS)**  
2 **to different zeolites using environmental samples**

3 Maura Mancinelli<sup>a,\*</sup>, Annalisa Martucci<sup>a</sup>, Lutz Ahrens<sup>b,\*</sup>

4 <sup>a</sup>Department of Physics and Earth Science, University of Ferrara, via Saragat, 1, 44122 Ferrara, Italy

5 <sup>b</sup> Department of Aquatic Sciences and Assessment, Swedish University of Agricultural Sciences  
6 (SLU), P.O. Box 7050, SE-750 07 Uppsala, Sweden

7

8 e-mail addresses: \*maura.mancinelli@unife.it (M. Mancinelli), \*lutz.ahrens@slu.se (L. Ahrens).

9

10 **Supplementary Information**

11 **Table SI.1.** Details of all investigated zeolites.

| Sample  | Framework-type | Supplier and product code                                | SiO <sub>2</sub> /Al <sub>2</sub> O <sub>3</sub> mole ratio | Surface Area (BET, m <sup>2</sup> /g) | Nominal cation form |
|---------|----------------|----------------------------------------------------------|-------------------------------------------------------------|---------------------------------------|---------------------|
| BETA25  | BEA            | Zeolyst International CP814E*                            | 25                                                          | 680                                   | Ammonium            |
| BETA360 | BEA            | Zeolyst International CP811C*300                         | 300                                                         | 620                                   | Hydrogen            |
| Y720    | FAU            | Zeolyst International CBV720                             | 30                                                          | 780                                   | Hydrogen            |
| Y760    | FAU            | Zeolyst International CBV760                             | 60                                                          | 720                                   | Hydrogen            |
| Y390    | FAU            | Tosoh Corporation HSZ390HUA                              | 500                                                         | 630                                   | Hydrogen            |
| MOR     | MOR            | Tosoh Corporation 690HUA                                 | 240                                                         | 450                                   | Hydrogen            |
| L       | LTL            | Tosoh Corporation 500KOA                                 | 6.1                                                         | 290                                   | Potassium           |
| CHA     | CHA            | Natural Chabasite (65%wt. Chabasite) from Zeolite Italia |                                                             |                                       |                     |

12

13

14

15 **Table SI.2**  $\Sigma$ PFAS uptake (%) from RW-F after 24h contact time.

16

| <b>PFAS uptake (%)</b> |      |
|------------------------|------|
| <b>RW1-F</b>           |      |
| <b>Beta25-RW1-F</b>    | 97.7 |
| <b>BETA360-RW1-F</b>   | 97.2 |
| <b>MOR-RW1-F</b>       | 96.5 |
| <b>Y760-RW1-F</b>      | 94.8 |
| <b>CHA-RW1-F</b>       | 75.1 |
| <b>PAC-RW1-F</b>       | 99.9 |
| <b>RW2-F</b>           |      |
| <b>Beta25-RW2-F</b>    | 99.3 |
| <b>Beta360-RW2-F</b>   | 98.3 |
| <b>MOR-RW2-F</b>       | 97.6 |
| <b>Y760-RW2-F</b>      | 96.0 |
| <b>CHA-RW2-F</b>       | 76.2 |
| <b>PAC-RW2-F</b>       | 99.9 |
| <b>RW3A-F</b>          |      |
| <b>Beta25-RW3A-F</b>   | 99.2 |
| <b>Beta360-RW3A-F</b>  | 97.8 |
| <b>MOR-RW3A-F</b>      | 97.2 |
| <b>Y760-RW3A-F</b>     | 94.9 |
| <b>CHA-RW3A-F</b>      | 53.2 |
| <b>PAC-RW3A-F</b>      | 99.9 |
| <b>RW3B-F</b>          |      |
| <b>Beta25-RW3B-F</b>   | 99.3 |
| <b>Beta360-RW3B-F</b>  | 96.6 |
| <b>MOR-RW3B-F</b>      | 97.0 |
| <b>Y760-RW3B-F</b>     | 96.4 |
| <b>CHA-RW3B-F</b>      | 81.3 |
| <b>PAC-RW3B-F</b>      | 99.9 |

17

18

19

20 **Table SI.3** Unit-cell parameters and Crystallite size (Å) for (A) Beta360, (B) CHA, (C) MOR, (D)  
 21 Y760, (E) Y390, (F) AgY760, (G) AgY390 zeolites, before and after PFAS loading and thermal  
 22 treatments up to 1400°C. Crystallite size obtained from the Scherrer equation. Legend: AS: as-  
 23 synthesized, bare sample; 18PFAS: loaded with  $\Sigma$ PFAS solution and data collected on the sample  
 24 subjected to 24 h contact time; REG air: samples heated up to 1400°C after  $\Sigma$ PFAS uptake; RW-F  
 25 series: loaded towards RW-F and data collected on the sample subjected to 24 h contact time.

26 **A.**

| BEA-type                    |                               | Beta360   | Beta360-18PFAS | REG_air_Beta360-18PFAS | Beta360-RW1-F | Beta360-RW2-F | Beta360-RW3A-F | Beta360-RW3B-F |
|-----------------------------|-------------------------------|-----------|----------------|------------------------|---------------|---------------|----------------|----------------|
| Polytype<br>A<br>P4122      | a = b (Å)                     | 11.148(6) | 11.087(1)      | 11.125(2)              | 11.064(2)     | 11.042(5)     | 11.199(2)      | 11.076(3)      |
|                             | c (Å)                         | 23.290(8) | 23.425(3)      | 23.420(5)              | 23.274(4)     | 23.607(1)     | 23.271(7)      | 23.419(6)      |
|                             | $\alpha = \beta = \gamma$ (°) | 90        | 90             | 90                     | 90            | 90            | 90             | 90             |
|                             | V (Å <sup>3</sup> )           | 2894.2(9) | 2879.7(2)      | 2898.7(1)              | 2849.4(1)     | 2878.7(8)     | 2918.5(2)      | 2873.4(3)      |
| Polytype<br>B<br>C2/c       | a (Å)                         | 17.843(3) | 17.657(2)      | 17.747(1)              | 17.639(4)     | 17.621(5)     | 17.649(6)      | 17.548(4)      |
|                             | b (Å)                         | 18.242(1) | 18.609(7)      | 18.970(7)              | 18.580(6)     | 18.442(6)     | 18.508(1)      | 18.720(6)      |
|                             | c (Å)                         | 15.305(6) | 15.420(3)      | 15.555(1)              | 15.473(1)     | 15.300(4)     | 15.318(5)      | 15.219(2)      |
|                             | $\alpha = \gamma$ (°)         | 90        | 90             | 90                     | 90            | 90            | 90             | 90             |
|                             | $\beta$ (°)                   | 118.18(3) | 117.30(2)      | 116.8(9)               | 116.94(9)     | 117.77(2)     | 116.65(2)      | 118.0(7)       |
|                             | V (Å <sup>3</sup> )           | 4390.8(3) | 4502.1(2)      | 4673.4(8)              | 4520.8(5)     | 4399.0(2)     | 4471.5(6)      | 4414.1(3)      |
| <b>Crystallite size (Å)</b> |                               | 80.3      | 82.9           | 80.2                   | 83.4          | 82.9          | 85.1           | 80.2           |

27

28 **B.**

|                                      | CHA                  | CHA-18PFAS | REG_air_CHA-18PFAS | CHA-RW1 -F | CHA-RW2 -F | CHA-RW3A-F | CHA-RW3B -F |
|--------------------------------------|----------------------|------------|--------------------|------------|------------|------------|-------------|
| <i>R-3m</i><br>Chabasite<br>CHA-type | a = b (Å)            | 13.7959(1) | 13.7989(1)         | -          | 13.7959(1) | 13.7953(1) | 13.7977(1)  |
|                                      | c (Å)                | 14.9716(2) | 14.9768(2)         | -          | 14.9685(2) | 14.9711(2) | 14.9738(2)  |
|                                      | V (Å <sup>3</sup> )  | 2467.75(5) | 2469.71(6)         | -          | 2467.23(5) | 2467.47(5) | 2468.79(5)  |
|                                      | $\alpha = \beta$ (°) | 90         | 90                 | -          | 90         | 90         | 90          |
|                                      | $\gamma$ (°)         | 120        | 120                | -          | 120        | 120        | 120         |
| <b>Crystallite size (Å)</b>          |                      | 974.5      | 1031.2             | -          | 1041.6     | 1072.8     | 1153.8      |

29

30

## 31 C.

|                                   | MOR                       | MOR-18PFAS | REG air MOR-18PFAS | MOR-RW1-F  | MOR-RW2-F  | MOR-RW3A-F | MOR-RW3B-F |            |
|-----------------------------------|---------------------------|------------|--------------------|------------|------------|------------|------------|------------|
| <i>Cmcm</i><br>Mordenite<br>(MOR) | a (Å)                     | 18.0754(2) | 18.0759(2)         | 18.0486(8) | 18.0792(2) | 18.0793(2) | 18.0568(2) | 18.0747(2) |
|                                   | b (Å)                     | 20.2380(2) | 20.2419(2)         | 20.1151(7) | 20.2457(2) | 20.2504(2) | 20.2321(2) | 20.2432(2) |
|                                   | c (Å)                     | 7.46418(8) | 7.46484(8)         | 7.4422(2)  | 7.46443(9) | 7.46615(9) | 7.46085(8) | 7.46443(8) |
|                                   | $\alpha=\beta=\gamma$ (°) | 90         | 90                 | 90         | 90         | 90         | 90         | 90         |
|                                   | V (Å <sup>3</sup> )       | 2730.47(5) | 2731.33(5)         | 2701.9(1)  | 2732.19(6) | 2733.47(6) | 2725.66(5) | 2731.17(5) |
| Crystallite size (Å)              | 810.3                     | 813.6      | 860.00             | 817.4      | 824.1      | 762.4      | 824.8      |            |

32

## 33 D.

|                             | Y760                      | Y760-18PFAS | REG air Y760-18PFAS | Y760-RW1-F | Y760-RW2-F | Y760-RW3A-F | Y760-RW3B-F |            |
|-----------------------------|---------------------------|-------------|---------------------|------------|------------|-------------|-------------|------------|
| <i>Fd-3</i><br>FAU-<br>type | a = b = c (Å)             | 24.2789(6)  | 24.2729(3)          | 24.2691(7) | 24.2763(2) | 24.2756(2)  | 24.2701(2)  | 24.2762(3) |
|                             | $\alpha=\beta=\gamma$ (°) | 90          | 90                  | 90         | 90         | 90          | 90          | 90         |
|                             | V (Å <sup>3</sup> )       | 14311.6(6)  | 14300.9(3)          | 14294.2(7) | 14307.1(2) | 14305.8(2)  | 14296.1(2)  | 14306.8(3) |
| Crystallite size (Å)        | 415.8                     | 753.0       | 711.1               | 778.2      | 755.2      | 702.8       | 609.1       |            |

34

## 35 E.

|                              | Y390                      | Y390-18PFAS |            |
|------------------------------|---------------------------|-------------|------------|
| <i>Fd-3m</i><br>FAU-<br>type | a = b = c (Å)             | 24.2882(4)  | 24.2845(1) |
|                              | $\alpha=\beta=\gamma$ (°) | 90          | 90         |
|                              | V (Å <sup>3</sup> )       | 14328.1(4)  | 14321.6(1) |
| Crystallite size (Å)         | 669.3                     | 642.7       |            |

36

## 37 F.

|                              | AgY760                    | AgY760-18PFAS |            |
|------------------------------|---------------------------|---------------|------------|
| <i>Fd-3m</i><br>FAU-<br>type | a = b = c (Å)             | 24.2844(4)    | 24.2767(2) |
|                              | $\alpha=\beta=\gamma$ (°) | 90            | 90         |
|                              | V (Å <sup>3</sup> )       | 14321.3(4)    | 14307.6(2) |
| Crystallite size (Å)         | 767.2                     | 797.4         |            |

38

39

40 **G.**

|                                                   |                                                 | <b>AgY390</b> | <b>AgY390-18PFAS</b> |
|---------------------------------------------------|-------------------------------------------------|---------------|----------------------|
| <b><i>Fd-3m</i></b><br><b>FAU-</b><br><b>type</b> | <b>a = b = c (Å)</b>                            | 24.2839(4)    | 24.2483 (1)          |
|                                                   | <b><math>\alpha = \beta = \gamma</math> (°)</b> | 90            | 90                   |
|                                                   | <b>V (Å<sup>3</sup>)</b>                        | 14320.5(4)    | 14257.5(4)           |
| <b>Crystallite size (Å)</b>                       |                                                 | 651.9         | 637.1                |

41

42

43 **Figure SI.1** X-ray powder diffraction pattern of (A) Beta360, (B) MOR, (C) CHA, (D) Y760, (E)  
44 Y390, (F) AgY760, (G) AgY390 zeolites. Colours legend: Blue line: as-synthesized sample; light  
45 blue line: sample heated at 900°C in air; green line:  $\Sigma$ PFAS-spiked with 24 h contact time; red line:  
46 RW1-F  $\Sigma$ PFAS-spiked with 24 h contact time; fuchsia: RW2-F  $\Sigma$ PFAS-spiked with 24 h contact  
47 time; violet line: RW3A-F  $\Sigma$ PFAS-spiked with 24 h contact time; orange line: RW3B-F  $\Sigma$ PFAS-  
48 spiked with 24 h contact time.

### A. Beta360

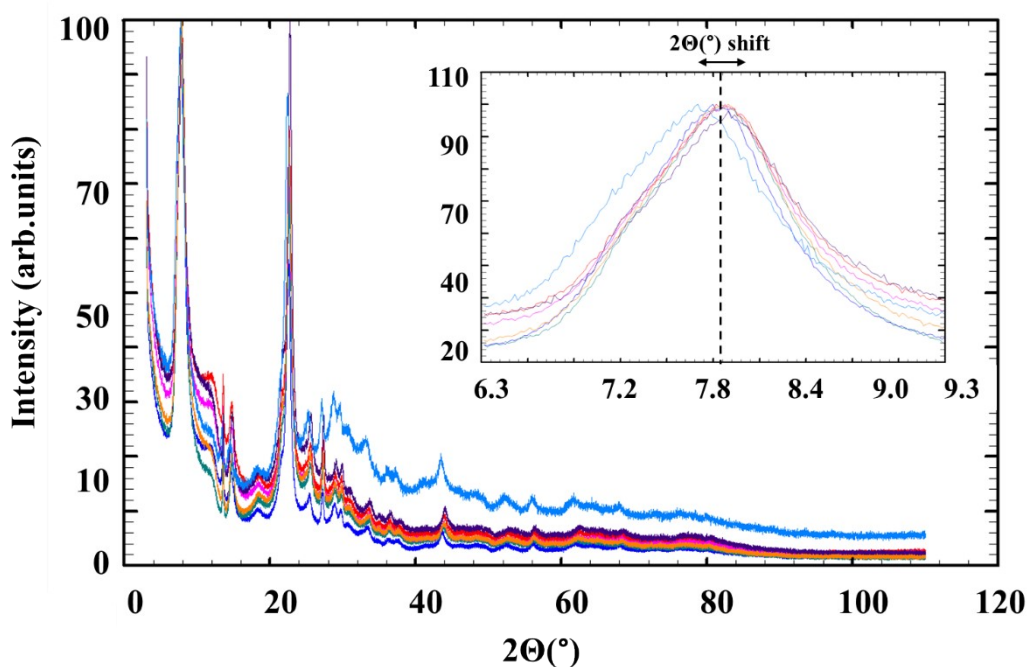

49

### B. MOR

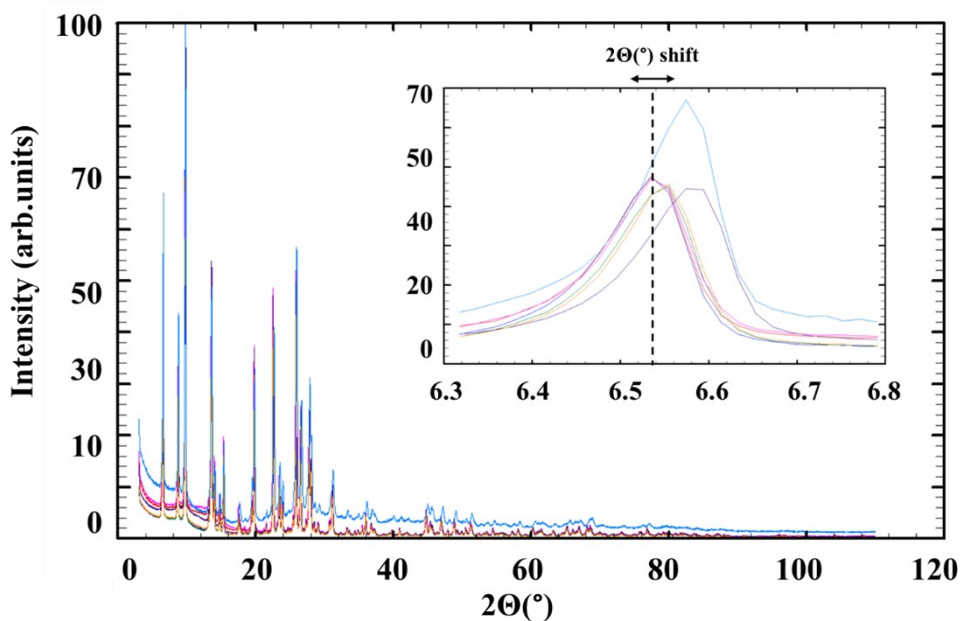

50

### C. CHA

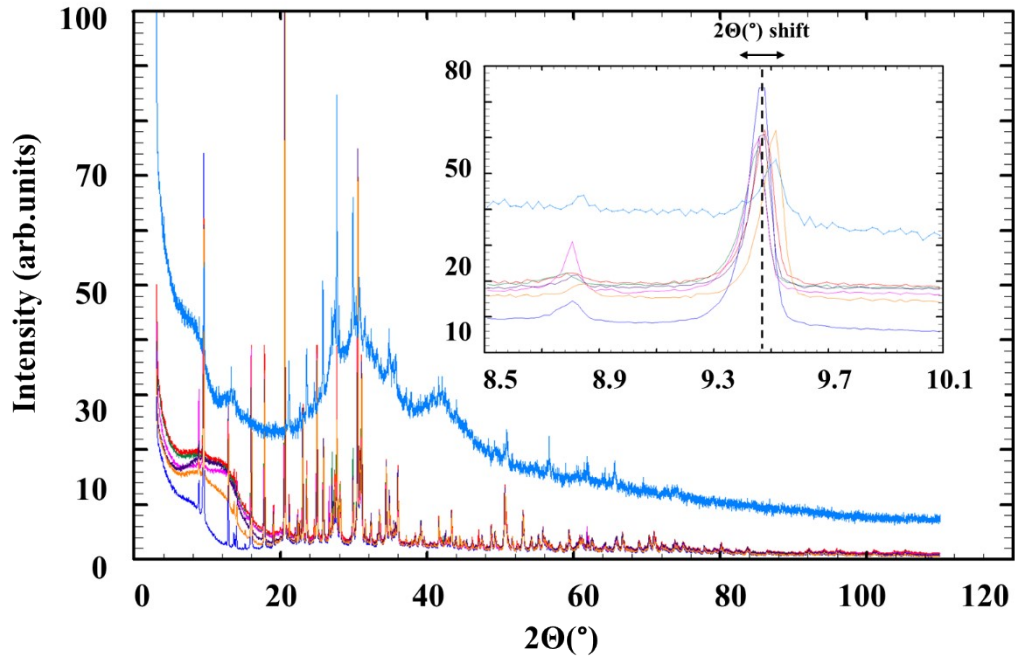

51

### D. Y760

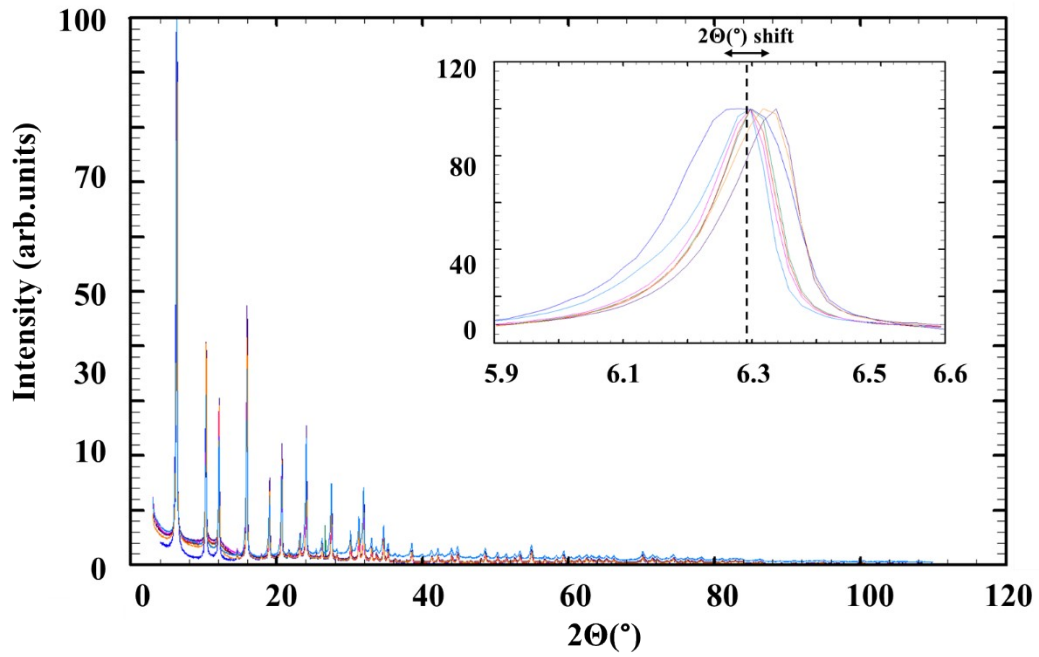

52

### E. Y390

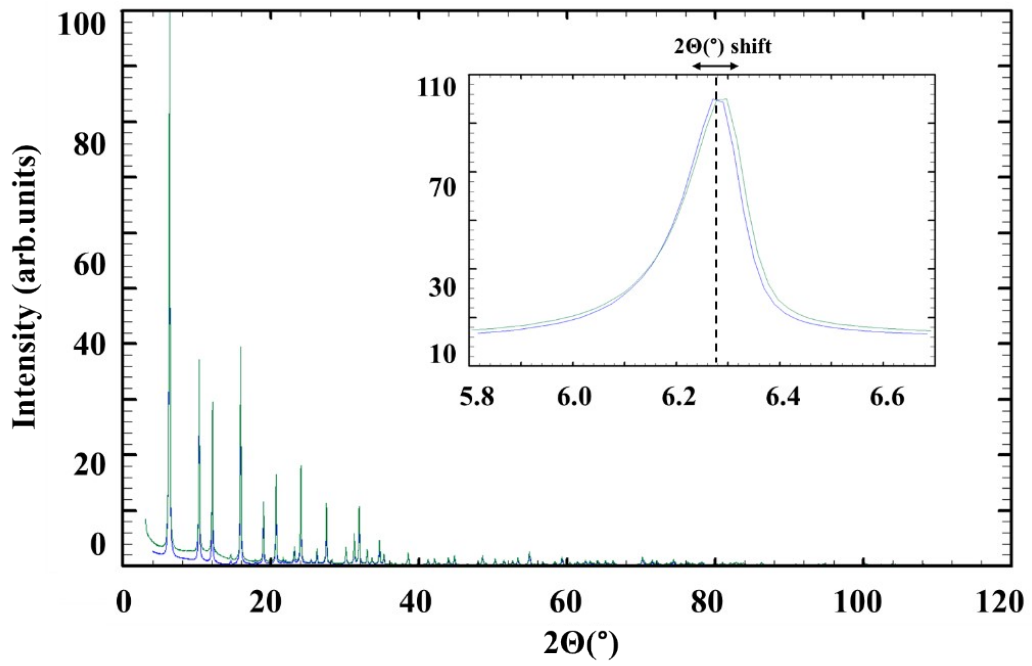

53

### F. AgY760

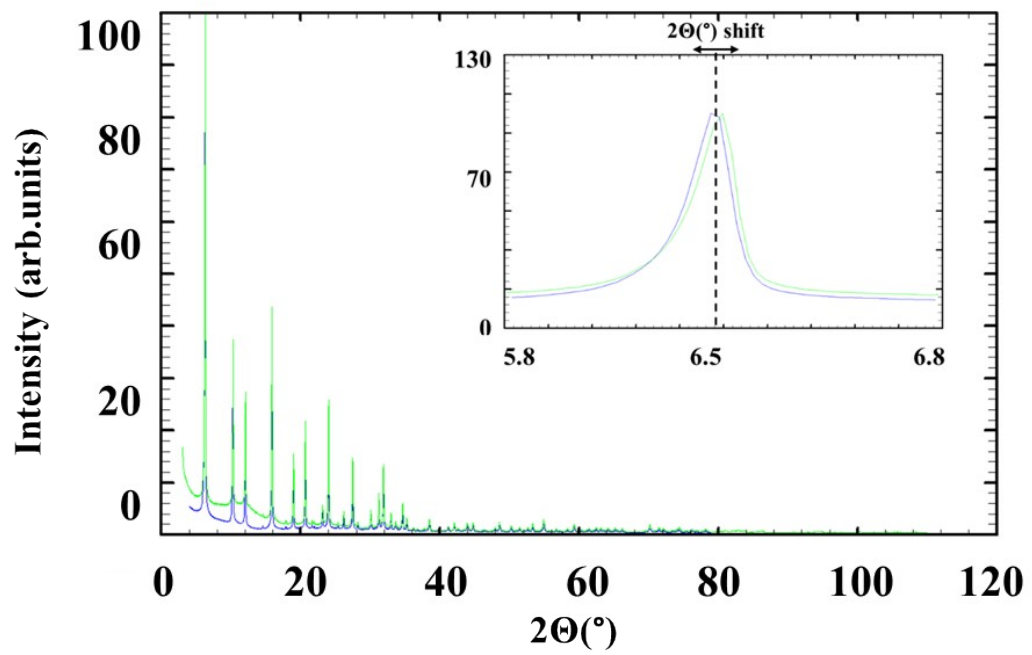

54



## G. AgY390

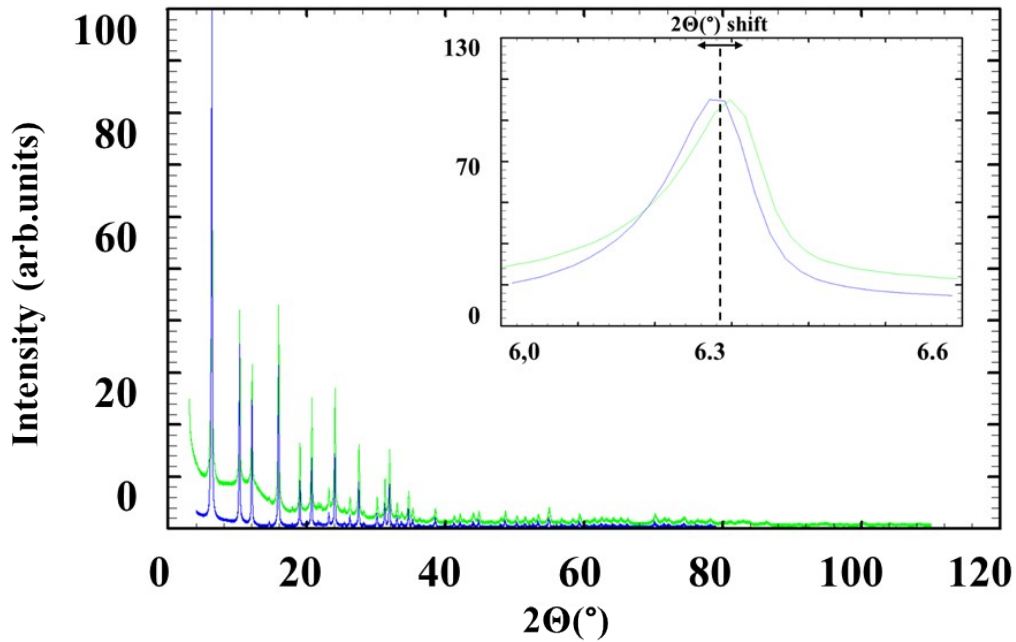

55

56 **Figure SI.2** Thermogravimetric (TG) and differential thermal analysis (DTA) conducted in air  
57 controlled atmosphere from RT to 1400°C (10°C/min heating rate) of (A) Beta360, (B) MOR, (C)  
58 CHA, (D) Y760, (E) Y390, (F) AgY760, (G) AgY390 zeolites. Colours legend: Blue line: bare  
59 sample; light blue line: calcined bare sample; green line:  $\Sigma$ PFAS-spiked with 24 h contact time; red  
60 line: RW1-F  $\Sigma$ PFAS-spiked with 24 h contact time; fuchsia: RW2-F  $\Sigma$ PFAS-spiked with 24 h contact  
61 time; violet line: RW3A-F  $\Sigma$ PFAS-spiked with 24 h contact time; orange line: RW3B-F  $\Sigma$ PFAS-  
62 spiked with 24 h contact time.

63

### A. Beta360

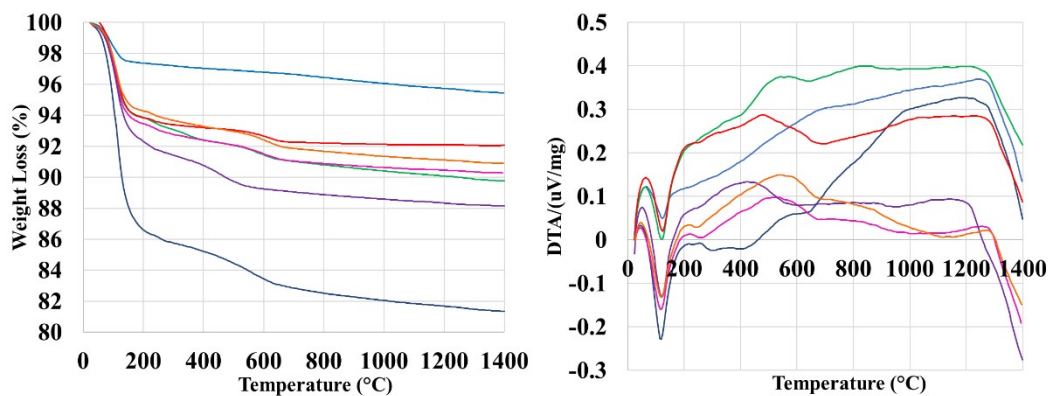

64

65

### B. MOR

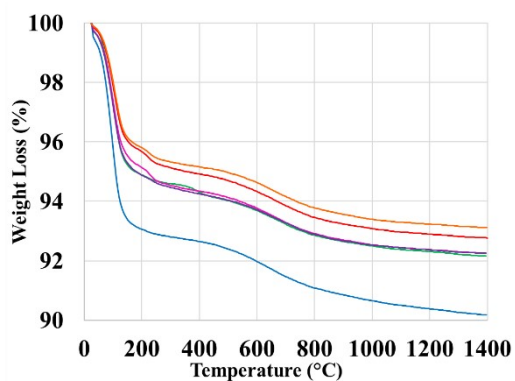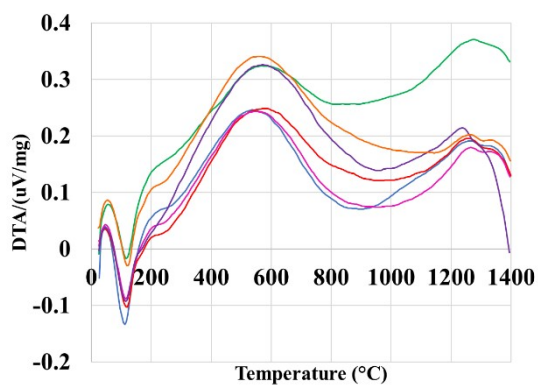

66

67

### C. CHA

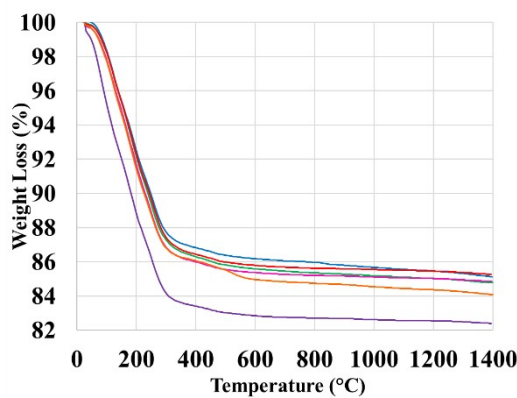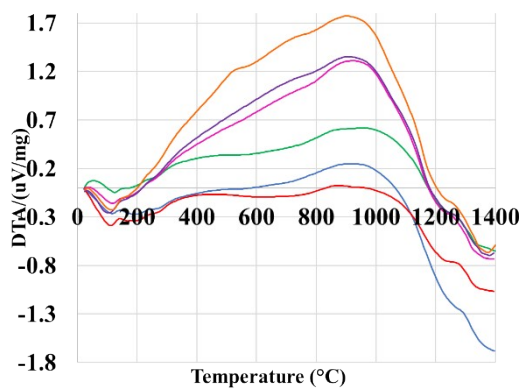

68

69

### D. Y760

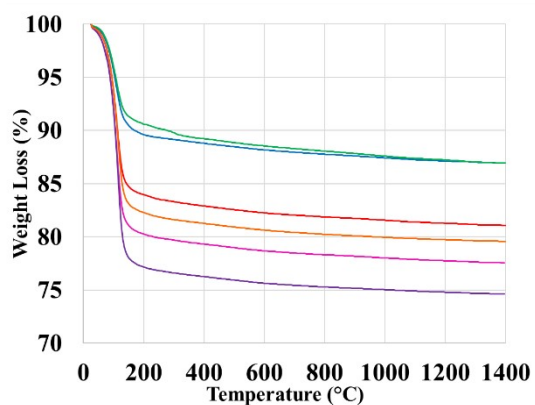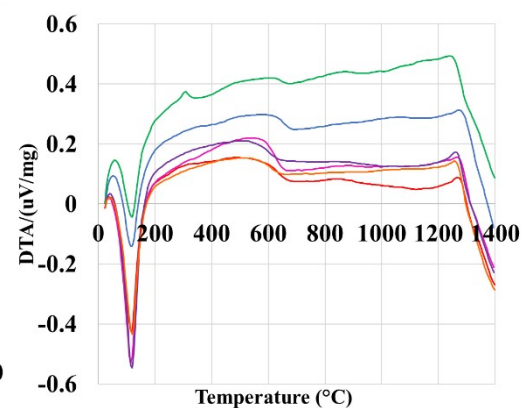

70

71

### E. Y390

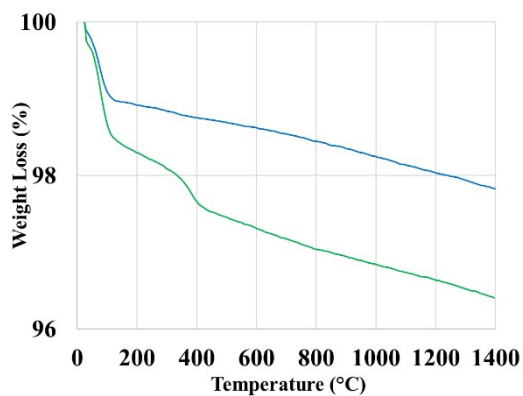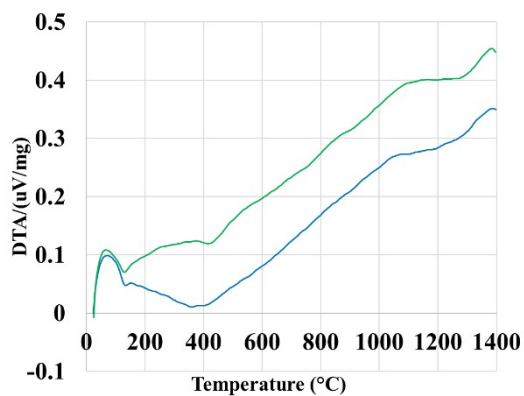

72

73

74

### F. AgY760

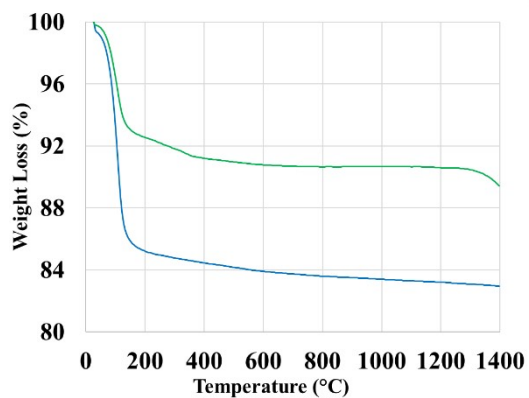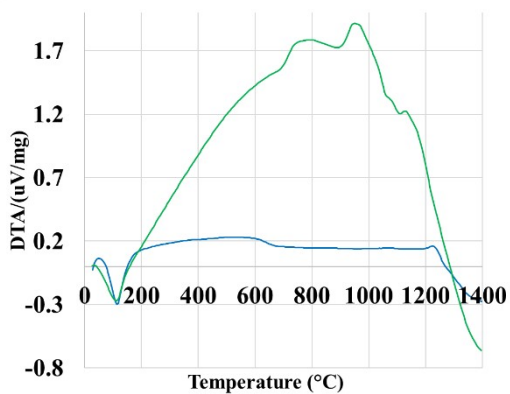

75

76

### G. AgY390

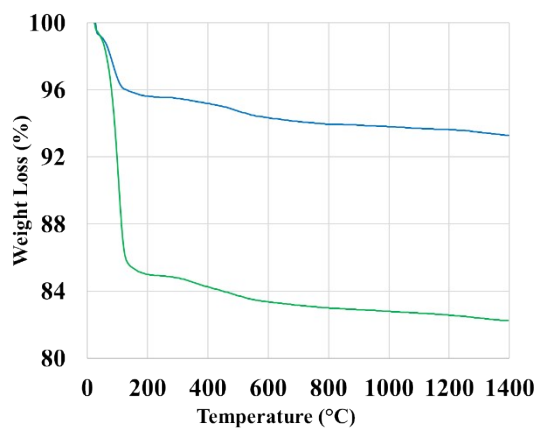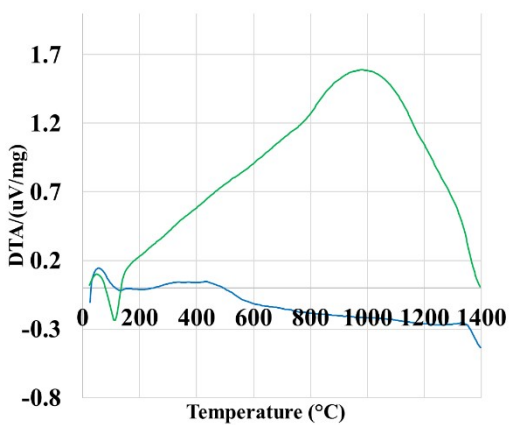

77

78

79
